# Supplementary material
Source: MDPI journal article supplement (https://www.mdpi.com/2079-6412/13/2/292)
Supplement: s1 [file s1 › coatings-2123666-supplementary.pdf]

# Numerical Investigation of the Effect of Symmetry on Evaporation Triggered Elastocapillary Top-Gathering of High Aspect Ratio Micropillars

Farshad Barghi Golezani, Rama Kishore Annavarapu and Hossein Sojoudi \*

Department of Mechanical, Industrial, and Manufacturing Engineering (MIME), The University of Toledo, 4006 Nitschke Hall, Toledo, OH 43606, USA

\* Correspondence: hossein.sojoudi@utoledo.edu

## Notes S1: Calculation of the Micropillar Displacement ( $\delta$ ): Water.

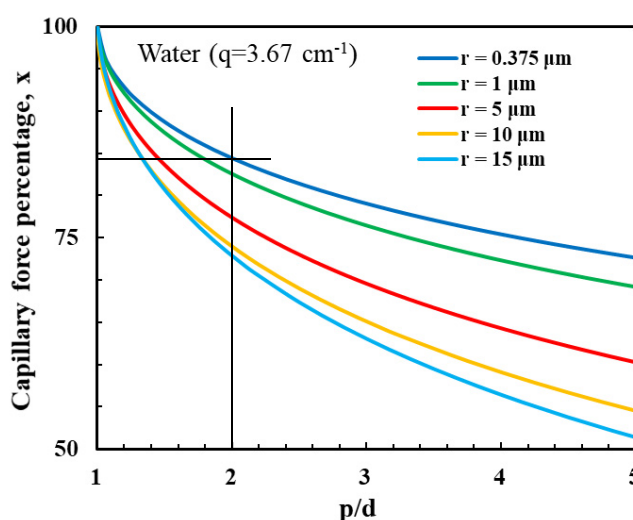

**Figure S1.** Capillary force percentage of water as a function of pitch over diameter. By knowing the distance of neighbor micropillar and its diameter, capillary force percentage could be found.

### Micropillar dimensions

Radius,  $r = 0.375 \mu\text{m}$

Height,  $h = 9 \mu\text{m}$

Micropillar spacing,  $p = 1.5 \mu\text{m}$

Elastic modulus,  $E = 0.745$  and  $1.2 \text{ GPa}$

### Liquid properties

Liquid: Water

Surface tension,  $\gamma = 72.5 \text{ mN/m}$

Contact angle,  $\theta = 60^\circ$

$n = 24$  (points located at  $15^\circ$  interval)

$$F_c = \pi d \gamma_{\text{Water}} \sin \theta = 0.1478 \mu\text{N} \quad (\text{S1})$$

$$f_1 = F_c/n = 0.1478/24 = 0.0061 \mu\text{N} \quad (\text{S2})$$

For four micropillar in a square arrangement,

Since,  $p/d = 2$  and  $r = 0.375 \mu\text{m}$

$$x_1 = 79 \% = 0.79 \quad (\text{S3})$$

$E = 0.745 \text{ GPa}$

$$\delta^* = 64f_1h^3/3\pi Ed^4 = 0.1294 \mu\text{m} \quad (\text{S4})$$

For  $x_2 = 0.59$  (for slight asymmetry)

$$\delta \approx 7.5(x_1 - x_2)\delta^* = 0.1941 \mu\text{m} \quad (\text{S5})$$

For  $x_2 = 0$  (for isolated capillary bridging)

$$\delta \approx 7.5(x_1 - x_2)\delta^* = 0.7667 \mu\text{m} \quad (\text{S6})$$

$E = 1.2 \text{ GPa}$

$$\delta^* = 64f_1h^3/3\pi Ed^4 = 0.0803 \mu\text{m} \quad (\text{S7})$$

For  $x_2 = 0.59$  (for slight asymmetry)

$$\delta \approx 7.5(x_1 - x_2)\delta^* = 0.1205 \mu\text{m} \quad (\text{S8})$$

For  $x_2 = 0$  (for isolated capillary bridging)

$$\delta \approx 7.5(x_1 - x_2)\delta^* = 0.4760 \mu\text{m} \quad (\text{S9})$$

The micropillars located on the edge of the droplet or liquid experience higher force-distributions similar to that for the isolated capillary bridging case and initiate the top-gathering phenomenon which in turn increases the asymmetry.

The calculated micropillar deflection values with  $E = 0.745 \text{ GPa}$  are high meaning that the micropillars are not stable against the capillary forces. However, the calculated deflection values are small with  $E = 1.2 \text{ GPa}$  which is in accordance with the experimental observations of D Chandra et al [1].

Notes S2: Calculation of the Micropillar Displacement ( $\delta$ ): Butyl acetate.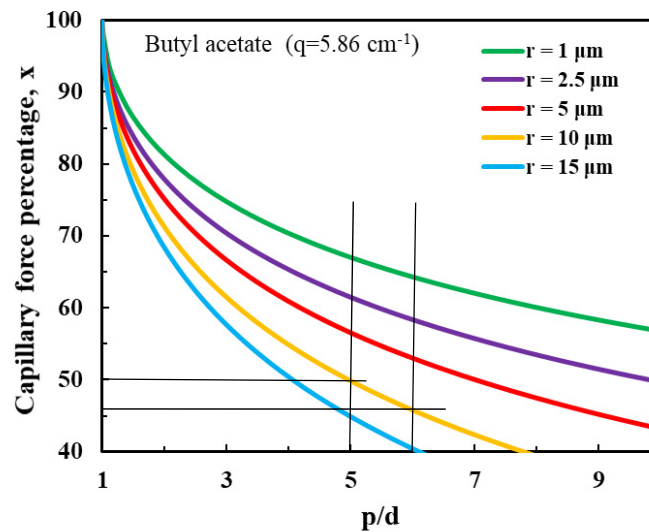

**Figure S2.** Capillary force percentage of Butyl acetate as a function of pitch over diameter. By knowing the distance of neighbor micropillar and its diameter, capillary force percentage could be found.

*Micropillar dimensions*

Height,  $h = 150 \mu\text{m}$

Micropillar spacing,  $p = 100 \mu\text{m}$

Elastic modulus,  $E = 0.0055 \text{ GPa}$

*Liquid properties*

Liquid: Butyl acetate

Surface tension,  $\gamma = 25.1 \text{ mN/m}$

Contact angle,  $\theta = 5.8^\circ$

$n = 24$  (points located at  $15^\circ$  interval)

Radius,  $r = 5 \mu\text{m}$  and spacing,  $p = 100 \mu\text{m}$

$$F_c = \pi d \gamma_{\text{Butyl acetate}} \sin \theta = 0.0796 \mu\text{N} \quad (\text{S10})$$

$$f_1 = F_c / n = 0.0796 / 24 = 0.0033 \mu\text{N} \quad (\text{S11})$$

For four micropillar in a square arrangement,

Since,  $p/d = 10$

$$x_1 = 42 \% = 0.42 \quad (\text{S12})$$

$$\delta^* = \frac{64 f_1 h^3}{3 \pi E d^4} = 1.3828 \mu\text{m} \quad (\text{S13})$$

For  $x_2 = 0.22$  (for slight asymmetry)

$$\delta \approx 7.5(x_1 - x_2) \delta^* = 2.0742 \mu\text{m} \quad (\text{S14})$$

For  $x_2 = 0$  (for isolated capillary bridging)

$$\delta \approx 7.5(x_1 - x_2) \delta^* = 4.3559 \mu\text{m} \quad (\text{S15})$$

Radius,  $r = 5 \mu\text{m}$  and spacing,  $p = 200 \mu\text{m}$

$$F_c = \pi d \gamma_{\text{Butyl acetate}} \sin \theta = 0.0796 \mu\text{N} \quad (\text{S16})$$

$$f_1 = F_c / n = 0.0796 / 24 = 0.0033 \mu\text{N} \quad (\text{S17})$$

For four micropillar in a square arrangement,

Since,  $p/d = 20$

$$x_1 = 20 \% = 0.20 \quad (\text{S18})$$

$$\delta^* = 64 f_1 h^3 / 3 \pi E d^4 = 1.3828 \mu\text{m} \quad (\text{S19})$$

For  $x_2 = 0.10$  (for slight asymmetry)

$$\delta \approx 7.5(x_1 - x_2) \delta^* = 1.0371 \mu\text{m} \quad (\text{S20})$$

For  $x_2 = 0$  (for isolated capillary bridging)

$$\delta \approx 7.5(x_1 - x_2) \delta^* = 2.0742 \mu\text{m} \quad (\text{S21})$$

Radius,  $r = 10 \mu\text{m}$  and Spacing,  $p = 100 \mu\text{m}$

$$F_c = \pi d \gamma_{\text{Butyl acetate}} \sin \theta = 0.1592 \mu\text{N} \quad (\text{S22})$$

$$f_1 = F_c / n = 0.0796 / 24 = 0.0066 \mu\text{N} \quad (\text{S23})$$

For four micropillar in a square arrangement,

Since,  $p/d = 5$

$$x_1 = 50 \% = 0.50 \quad (\text{S24})$$

$$\delta^* = 64 f_1 h^3 / 3 \pi E d^4 = 0.1728 \mu\text{m} \quad (\text{S25})$$

For  $x_2 = 0.30$  (for slight asymmetry)

$$\delta \approx 7.5(x_1 - x_2) \delta^* = 0.2592 \mu\text{m} \quad (\text{S26})$$

For  $x_2 = 0$  (for isolated capillary bridging)

$$\delta \approx 7.5(x_1 - x_2) \delta^* = 0.6482 \mu\text{m} \quad (\text{S27})$$

Radius,  $r = 10 \mu\text{m}$  and Spacing,  $p = 200 \mu\text{m}$

$$F_c = \pi d \gamma_{\text{Butyl acetate}} \sin \theta = 0.1592 \mu\text{N} \quad (\text{S28})$$

$$f_1 = F_c / n = 0.0796 / 24 = 0.0066 \mu\text{N} \quad (\text{S29})$$

For four micropillar in a square arrangement,

Since,  $p/d = 10$

$$x_1 = 20 \% = 0.20 \quad (\text{S30})$$

$$\delta^* = 64f_1 h^3 / 3\pi E d^4 = 0.1728 \mu\text{m} \quad (\text{S31})$$

For  $x_2 = 0.42$  (for slight asymmetry)

$$\delta \approx 7.5(x_1 - x_2)\delta^* = 0.1296 \mu\text{m} \quad (\text{S32})$$

For  $x_2 = 0$  (for isolated capillary bridging)

$$\delta \approx 7.5(x_1 - x_2)\delta^* = 0.2592 \mu\text{m} \quad (\text{S33})$$

The calculated deflection values for micropillars having radius,  $r = 5 \mu\text{m}$  (or diameter,  $d = 10 \mu\text{m}$ ) are high ( $> 0.5 \mu\text{m}$ ) for spacings  $100 \mu\text{m}$  and  $200 \mu\text{m}$ , meaning that the micropillars are not stable against the capillary forces.

The calculated deflection values are small ( $< 0.5 \mu\text{m}$  for isolated capillary bridging case) for micropillars having radius,  $r = 10 \mu\text{m}$  (or diameter,  $d = 20 \mu\text{m}$ ) for a spacing,  $p = 200 \mu\text{m}$ , meaning that the micropillars are stable against the capillary forces for the chosen spacing. However, for spacing,  $p = 100 \mu\text{m}$  the deflection of the micropillar is greater than  $0.5 \mu\text{m}$  and hence the micropillars are not stable against capillary forces, which is in accordance with the experimental observations of J Hansson et al [2].

### Notes S3: Deflection Calculation Equations

According to Kralchevsky et al. [3] equation S34 may be used to represent the capillary force that is applied to a micropillar while taking into consideration the force distribution:

$$F_c = \pi d \gamma_L \sin \theta \left( \frac{h_c - h_\alpha}{h_\alpha} \right) \quad (\text{S34})$$

By considering this assumption that micropillars top gather (come together) by a deflection of  $\delta$  in both directions and the capillary curvature is ( $q = \frac{1}{\text{Capillary length}}$ ),  $h_c$  and  $h_\alpha$  are defined as equations S35 and S36:

$$h_\alpha = \frac{d \cdot \cos \theta}{2} \ln \left( \frac{8}{\gamma q d (1 + \sin \theta)} \right) \quad (\text{S35})$$

$$h_c = \frac{d \cdot \cos \theta}{2} \ln \left( \frac{16}{\gamma^2 q^2 d (\sqrt{(p - \delta)^2 - d^2} + p - \delta)} \right) \quad (\text{S36})$$

By substituting equations 2 and 3 in equation 1, new capillary force is calculated. The elastic restoring force acting on the deflected micropillar is given as equation S37:

$$F_E = \frac{3\pi E d^4 \delta}{64 h^3} \quad (\text{S37})$$

By equalizing equations S34 and S37, elasticity and capillarity are coupled to each other, and the deflection is calculated as shown in equation S38.

$$\frac{3\pi E d^4 \delta}{64 h^3} = \pi d \gamma_L \sin \theta \left( \frac{\frac{d \cdot \cos \theta}{2} \ln \left( \frac{16}{\gamma^2 q^2 d (\sqrt{(p - \delta)^2 - d^2} + p - \delta)} \right) - \frac{d \cdot \cos \theta}{2} \ln \left( \frac{8}{\gamma q d (1 + \sin \theta)} \right)}{\frac{d \cdot \cos \theta}{2} \ln \left( \frac{8}{\gamma q d (1 + \sin \theta)} \right)} \right) \quad (\text{S38})$$

## References

1. Chandra, D.; Yang, S. Stability of High-Aspect-Ratio Micropillar Arrays against Adhesive and Capillary Forces. *Acc. Chem. Res.* **2010**, *43*, 1080–1091. <https://doi.org/10.1021/ar100001a>.
2. Hansson, J.; Yasuga, H.; Haraldsson, T.; van der Wijngaart, W. Synthetic microfluidic paper: High surface area and high porosity polymer micropillar arrays. *Lab Chip* **2015**, *16*, 298–304. <https://doi.org/10.1039/c5lc01318f>.
3. Kralchevsky, P.; Paunov, V.; Ivanov, I.; Nagayama, K. Capillary meniscus interaction between colloidal particles attached to a liquid—Fluid interface. *J. Colloid Interface Sci.* **1992**, *151*, 79–94. [https://doi.org/10.1016/0021-9797\(92\)90239-i](https://doi.org/10.1016/0021-9797(92)90239-i).

**Disclaimer/Publisher's Note:** The statements, opinions and data contained in all publications are solely those of the individual author(s) and contributor(s) and not of MDPI and/or the editor(s). MDPI and/or the editor(s) disclaim responsibility for any injury to people or property resulting from any ideas, methods, instructions or products referred to in the content.
